# Supplementary material
Source: MDPI journal article supplement (https://www.mdpi.com/2073-4344/11/11/1352)
Supplement: s1 [file s1]

***Supporting Information***  
***For***  
**Highly Sensitive and Selective Copper (II)-Catalyzed**  
**Dual-DNAzyme Colorimetric Biosensor Based on**  
**Exonuclease III-Mediated Cyclical Assembly**

Baiqiang Zhai <sup>1,2</sup>, Kunlun Huang <sup>2</sup>, Hongtao Wang <sup>1</sup>, Dongmin Su <sup>3,\*</sup> and Yuancong Xu <sup>2,4,\*</sup>

<sup>1</sup> Henan Railway Food Safety Management Engineering Technology Research Center, Zhengzhou Railway Vocational & Technology College, Zhengzhou 451460, China; zhaibaiqiang@zzrvtc.edu.cn (B.Z.); 10554@zzrvtc.edu.cn (H.W.)

<sup>2</sup> Beijing Laboratory for Food Quality and Safety, College of Food Science and Nutritional Engineering, China Agricultural University, Beijing 100083, China; hkl009@163.com

<sup>3</sup> College of Food and Bioengineering, Zhengzhou University of Light Industry, Zhengzhou 450002, China

<sup>4</sup> Beijing Key Laboratory of Environmental and Viral Oncology, Faculty of Environment and Life, Beijing University of Technology, Beijing 100124, China

\* Correspondence: dongminsu@haut.edu.cn (D.S.); xuyuancong@bjut.edu.cn (Y.X.); Tel.: +86- 0371-86608028 (D.S.); +86-010-67396139 (Y.X.)

Table S1

Table S1. Oligonucleotides used in this study.

| Name       | Sequence (5'—3')                                                  |
|------------|-------------------------------------------------------------------|
| Cu-S       | GCTTCTTTCTAATACGCTCCCT<br>FAM-GCTTCTTTCTAATACGCTCCCT              |
| Cu-E       | AGGGAGCCTGGGCCTCTTCTTTTTTAAGAAAGAAC                               |
| CUzyme     | GCTTCTTTCTAATACGCTCCCTCCCAGGGAGCCTGG<br>GCCTCTTTCTTTTTTAAGAAAGAAC |
| G4-DNAzyme | CTGGGAGGGAGGGAGGGAG<br>FAM-CTGGGAGGGAGGGAGGGAG                    |
| G4-T       | TTTTTCTGGGAGGGAGGGAGGGAG                                          |
| G4-1       | CTGGGAGGGAGGG                                                     |
| G4-T-1     | CCCAGAAAAA                                                        |
| G4-2       | CTGGGAGGGA                                                        |
| G4-T-2     | CCCTCCCAGAAAAA                                                    |
| G4-C       | FAM-CCCTCCCTCCCTCCCAG                                             |
| G4-M       | CTGGGAGGGACCCAG                                                   |

Note: orange markers = active site

**Table S2**Table S2. Comparison among previously reported method for the detection of Cu<sup>2+</sup>.

| Target           | Method                           | Element                                          | LOD     | Reference |
|------------------|----------------------------------|--------------------------------------------------|---------|-----------|
| Cu <sup>2+</sup> | Colorimetric Biosensor           | Cu-DNAzyme/G4-DNAzyme                            | 100 nM  | [1]       |
| Cu <sup>2+</sup> | Biosensor (glucose meters)       | Cu-DNAzyme/ glucose                              | 1 nM    | [2]       |
| Cu <sup>2+</sup> | Electrochemical Biosensor        | Cu-DNAzyme/ Fe(CN) <sub>6</sub> <sup>3-/4-</sup> | 0.07 nM | [3]       |
| Cu <sup>2+</sup> | Plasmonic spectroscopy biosensor | Cu-DNAzyme/ AuNPs                                | 0.08 nM | [4]       |
| Cu <sup>2+</sup> | DNA walker biosensor             | Cu-DNAzyme/ magnetic beads                       | 3 nM    | [5]       |
| Cu <sup>2+</sup> | Colorimetric Biosensor           | Cu-DNAzyme/G4-DNAzyme                            | 0.16 nM | This work |

**References**

- [1] Ge C, Luo Q, Wang D, et al. Colorimetric detection of copper (II) ion using click chemistry and hemin/G-quadruplex horseradish peroxidase-mimicking DNAzyme[J]. Analytical chemistry, 2014, 86(13): 6387-6392.
- [2] Ming J, Fan W, Jiang T F, et al. Portable and sensitive detection of copper (II) ion based on personal glucose meters and a ligation DNAzyme releasing strategy[J]. Sensors and Actuators B: Chemical, 2017, 240: 1091-1098.
- [3] Hu W, Min X, Li X, et al. DNAzyme catalytic beacons-based a label-free biosensor for copper using electrochemical impedance spectroscopy[J]. RSC advances, 2016, 6(8): 6679-6685.
- [4] Dou Z, Zhang W, Du Q, et al. An in-situ plasmonic spectroscopy based biosensor for detection of copper (II) ions highlighting analytical specifications[J]. Sensors and Actuators B: Chemical, 2021, 329: 129103.
- [5] Zhou L, Xiong Y, Wang H, et al. Target-triggered DNAzyme walker with 3D walking unit for copper species sensing in serum: A multivalent binding strategy for improving the detection performance[J]. Sensors and Actuators B: Chemical, 2021, 334: 129589.

**Figure S1**

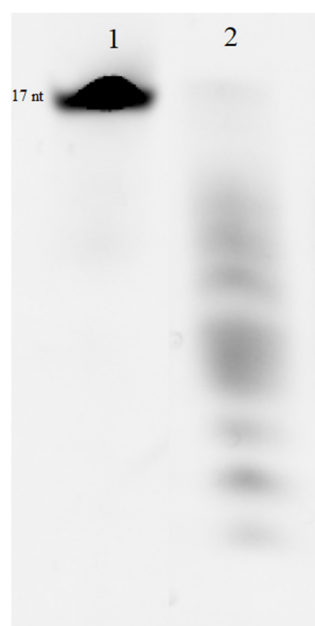

Figure S1. Hydrolyzing reaction of *Exo* III. Lane 1: FAM-G4-C; Lane 2: Products.

**Figure S2**

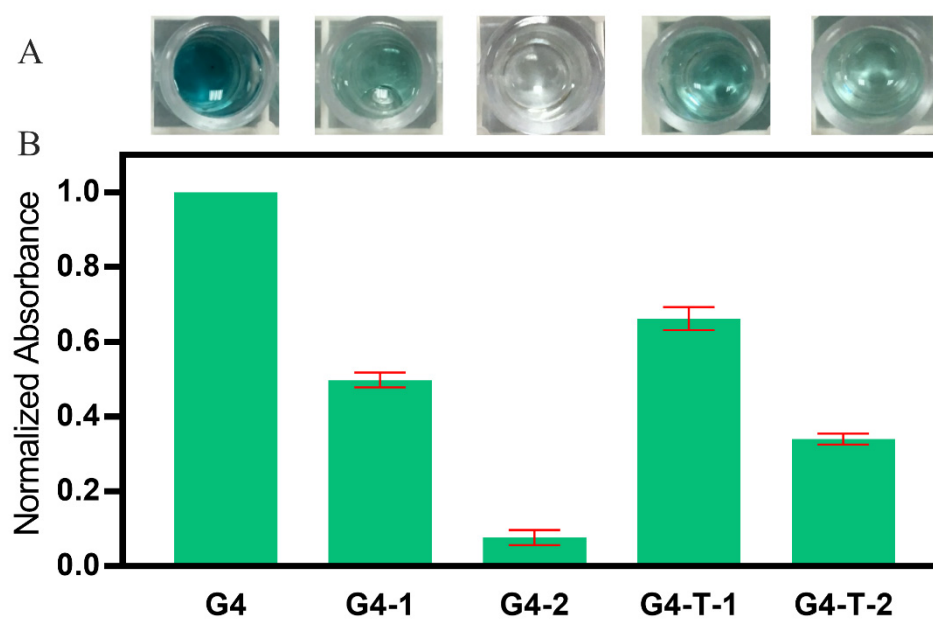

Figure S2. Color reaction. **(A)** Photograph; **(B)** Normalized absorbance.
